# Pleiotropy or linkage? Their relative contributions to the genetic correlation of quantitative traits and detection by multi-trait GWA studies.

Jobran Chebib and Frédéric Guillaume

*Department of Evolutionary Biology and Environmental Studies, University of Zürich,  
Winterthurerstrasse 190, CH-8057 Zürich, Switzerland. email:  
frederic.guillaume@ieu.uzh.ch*

---

## Abstract

Genetic correlations between traits may cause correlated responses to selection. Previous models described the conditions under which genetic correlations are expected to be maintained. Selection, mutation and migration are all proposed to affect genetic correlations, regardless of whether the underlying genetic architecture consists of pleiotropic or tightly-linked loci affecting the traits. Here, we investigate the conditions under which pleiotropy and linkage have differential effects on the genetic correlations between traits by explicitly modeling multiple genetic architectures to look at the effects of selection strength, degree of correlational selection, mutation rate, mutational variance, recombination rate, and migration rate. We show that at mutation-selection(-migration) balance, mutation rates differentially affect the equilibrium levels of genetic correlation when architectures are composed of pairs of physically linked loci compared to architectures of pleiotropic loci. Even when there is perfect linkage (no recombination within pairs of linked loci), a lower genetic correlation is maintained than with pleiotropy, with a lower mutation rate leading to a larger decrease. These results imply that the detection of causal loci in multi-trait association studies will be affected by the type of underlying architectures, whereby pleiotropic variants are more likely to be underlying multiple detected associations. We also confirm that

tighter linkage between non-pleiotropic causal loci maintains higher genetic correlations at the traits and leads to a greater proportion of false positives in association analyses.

*Keywords:* Pleiotropy, Linkage, Genetic Architecture, GWAS, Migration, Mutation

---

## 1 **Introduction**

2 Both pleiotropy and linkage disequilibrium create genetic correlations be-  
3 tween traits so that traits do not vary independently of one another (Wright,  
4 1977; Arnold, 1992; Walsh and Blows, 2009). Under natural selection, this  
5 process can prevent a combination of traits from reaching their respective op-  
6 timum trait values favored by natural selection (Falconer and Mackay, 1996).  
7 Likewise, under artificial selection it can constrain breeders from improving  
8 one trait due to undesired changes in another, and in medical gene targeted  
9 therapy treatments it can cause adverse side-effects (Wright, 1977; Parkes  
10 et al., 2013; Visscher et al., 2017; Wei and Nielsen, 2019). Pleiotropy may  
11 cause genetic correlation because one gene's product (e.g., an enzyme or a  
12 transcription factor) has more than one target and therefore affects more  
13 than one trait or because one gene's product belongs to a metabolic pathway  
14 that has more than one downstream effect (Hodgkin, 1998; Stearns, 2010;  
15 Wagner and Zhang, 2011). Linkage disequilibrium (LD) may be the result of  
16 a set of loci in close physical proximity on a chromosome that makes a set of  
17 alleles at those loci less likely to be split up by recombination and therefore  
18 more likely to get passed on together from one generation to the next. But  
19 other mechanisms leading to the transmission of one combination of alleles  
20 at separate loci over another combination, can also generate LD and cre-  
21 ate genetic correlations between traits that those loci affect (e.g., assortative  
22 mating, environmental correlations) (Falconer and Mackay, 1996).

23 One of the main objectives of a genome-wide association study (GWAS)  
24 is to identify causal genetic variants underlying one or more traits. GWASes

25 leverage the rapid increase in genomic sequencing to find correlations between  
26 traits and genotypes, and their success is dependent on the effect sizes of the  
27 loci and the distinction between phenotypes. GWASes have had success  
28 in associating genetic variants with traits of interest, which have allowed  
29 researchers to find the molecular underpinnings of trait change (Visscher  
30 et al., 2017). Moving from one trait to two or more trait associations can  
31 lead to discovering pleiotropic loci (Saltz et al., 2017). One GWAS using 1094  
32 traits and 14,459 genes, found that 44% of genes were “pleiotropic”, but this  
33 was determined by assigning genetic variants to the closest gene and even to  
34 both flanking genes when the genetic variant was intergenic (Chesmore et al.,  
35 2018). This conflates linkage and pleiotropy, and the chain of causality (Platt  
36 et al., 2010). Another study, found 90% of genes and 32.4% of SNPs were  
37 associated with more than one trait domain, but they could not rule out  
38 SNPs associated with traits due to linkage disequilibrium (Watanabe et al.,  
39 2018). Unfortunately, determining whether genetic variant associations and  
40 trait correlations are actually the result of pleiotropy or linkage is difficult  
41 since they often map to large regions of genomes, or are in intergenic regions  
42 and don’t associate with the closest genes (Flint and Mackay, 2009; Zhu  
43 et al., 2016; Peichel and Marques, 2017; Visscher et al., 2017). Distinguishing  
44 between the two types of genetic architectures is important for understanding  
45 the underlying molecular functions of the traits, and determining how the  
46 traits may be differentially affected by selection (Lynch et al., 1998; Barrett  
47 and Hoekstra, 2011; Saltz et al., 2017). This is salient at a time when an  
48 increasing number of traits of interest (e.g., human diseases) appear to be  
49 affected by loci that affect other traits, and especially when targeted gene  
50 therapy clinical trials are more widespread than ever (Edelstein et al., 2007;  
51 Cai et al., 2016; Pickrell et al., 2016; Visscher and Yang, 2016; Chesmore  
52 et al., 2018; Ginn et al., 2018). There are potentially negative implications for  
53 gene therapy because fixing a gene underlying one disease might increase risk  
54 for another disease. For example, some genetic variants that are associated

55 with greater risk of Ankylosing spondylitis are also associated with less risk  
56 of Rheumatoid arthritis, and so “fixing” one gene would have undesired side-  
57 effects in this case (Parkes et al., 2013; Gratten and Visscher, 2016).

58 But the evolutionary dynamics of pleiotropic versus linked loci in creat-  
59 ing genetic correlations are expected to be different, since pleiotropy requires  
60 only one mutation to affect multiple traits and build-up genetic correlations,  
61 and linked pairs require two. Mutation rate should be an important factor  
62 distinguishing pleiotropy and linked pairs because single mutations affecting  
63 more than one trait provides the opportunity for combinations of effects to  
64 match patterns of correlational selection better than linked loci that affect  
65 one trait at a time. Thus, linked pairs may require high mutation rates to  
66 maintain genetic correlations. Recombination can also reduce genetic corre-  
67 lations between traits by breaking up associations between alleles at linked  
68 loci, but the same cannot occur with a pleiotropic locus (but see Wagner  
69 et al. (2007) for other mechanisms to alleviate pleiotropic constraints). Poly-  
70 genic analytical models attempting to approximate the level of genetic vari-  
71 ance and covariance at mutation-selection balance in a population suggest  
72 that tight linkage between pairs of loci affecting separate traits “is nearly  
73 equivalent to” pleiotropic loci affecting both traits (Lande, 1984). Therefore,  
74 genetic correlations between traits can be approximated using previously  
75 elucidated pleiotropic models under certain conditions (Lande, 1980, 1984;  
76 Turelli, 1985). On the other hand, more recent extensions of Fisher’s Ge-  
77 ometric Model (Fisher, 1930) predict that pleiotropic mutations, compared  
78 to mutations that affect only one trait, are less likely to be beneficial over-  
79 all since a beneficial effect on one trait may be detrimental to others (Orr,  
80 1998; Otto, 2004). The detriment of pleiotropic effects is exacerbated when  
81 increasing the strength of selection or with very strong correlational selection  
82 between traits, since both reduce the amount of phenotypic space where mu-  
83 tations are beneficial (unless pleiotropic effects are aligned with the fitness  
84 surface created by correlational selection). This detriment is not present for

85 linked loci affecting separate traits since their beneficial mutations will not  
86 have the collateral effects of pleiotropy. These, therefore suggest that linkage  
87 and pleiotropy may have differential effects on genetic variance and covari-  
88 ances depending on mutation, recombination and selection regimes, but this  
89 comparison was not fully explored in any previous model.

90 Lande (1984) predicted that when loci affecting *different* traits are tightly  
91 linked, and there is strong correlational selection between traits, recombina-  
92 tion rates between loci affecting different traits can strongly affect genetic  
93 correlations between traits, when selection is weak and mutation rates are  
94 relatively high. In an extreme case where there is complete linkage between  
95 pairs of loci affecting different traits (the recombination rate is 0), and no  
96 linkage between sets of these pairs of linked loci (the recombination rate is  
97 0.5), then he determined that the maximum genetic correlation due to link-  
98 age may be almost as large as the extent of correlational selection, which can  
99 be calculated from the (per linkage group) genetic covariance between traits  
100 and the genetic variances, respectively, as:

$$\text{genetic covariance } (b) = \frac{\rho\omega^2\mu\alpha^2}{2c}, \quad (1)$$

101

$$\text{genetic variance } (c) = \sqrt{(1 + \sqrt{1 - \rho^2})\omega^2\frac{\mu\alpha^2}{2}}, \quad (2)$$

102 where  $\rho$  is the extent of correlational selection acting between the traits,  $\omega^2$  is  
103 the strength of selection (with lower values representing stronger selection),  $\mu$   
104 is the per-locus mutation rate, and  $\alpha^2$  is the per-locus mutation variance. If  
105 there is equal variances among traits then the genetic correlation is calculated  
106 as:

$$\text{genetic correlation} = \frac{b}{c} = \frac{\rho}{1 + \sqrt{1 - \rho^2}}. \quad (3)$$

107 From these equations we see that, even in the absence of pleiotropy, genetic  
108 covariance may arise from linkage disequilibrium, and depends on both the  
109 strength of correlational selection between traits and selection on each trait,

110 as well as on the mutational inputs (mutation rates and mutational vari-  
111 ances) of the genes affecting those traits. Yet, from equation (3), the genetic  
112 correlation is independent of the genetic architecture of the traits. Lande  
113 goes on further to state that the case of complete linkage between pairs of  
114 loci affecting different traits is “equivalent to a lesser number of loci with  
115 pleiotropic effects”, but this is not quantified nor is the scaling of the two  
116 examined. We seek to quantify the equivalence of pleiotropy and linkage in  
117 their ability to maintain equilibrium levels of genetic (co)variation under the  
118 same conditions. We also wish to extend this to look at a range of link-  
119 age distances, selection variances and correlations, and mutation rates and  
120 variances, to look at the relative effects of each.

121 The expectations given by Lande are only expected to be accurate under  
122 conditions where mutation rates are high compared to the strength of selec-  
123 tion on the traits of interest (Turelli, 1984; Turelli and Barton, 1990). When  
124 mutation rates are lower  $< 10^{-4}$ , predictions for equilibrium levels of genetic  
125 variation break down and are better approximated by the a “house-of-cards”  
126 model (Kingman, 1978; Turelli, 1984). Analytic predictions for equilibrium  
127 levels of genetic covariation between traits due to linkage disequilibrium, on  
128 the other hand, have not been well explored for the “house-of-cards” model  
129 (Bürger, 2000).

130 Additionally, levels of trait genetic covariation can be influenced by other  
131 evolutionary processes that affect allele frequencies, and the covariation of al-  
132 lelic values in a population (e.g., migration (Guillaume and Whitlock, 2007),  
133 drift (Griswold et al., 2007), inbreeding (Lande, 1984), and phenotypic plas-  
134 ticity (Draghi and Whitlock, 2012)). Migration affects genetic covariation  
135 because when it is sufficiently high (relative to selection in the focal popula-  
136 tion), then combinations of alleles coming from a source population will also  
137 be maintained in the focal population. This can lead to higher genetic co-  
138 variation between traits in the focal populations, whether the combinations  
139 of alleles immigrating are (more likely to be) correlated in their effects on

140 those traits or not (Guillaume and Whitlock, 2007). Migration may also have  
141 different effects depending on whether the genetic architecture is pleiotropic  
142 or made up of linked loci, but this has not been explored.

143 Here, we are interested in the conditions in which pleiotropic architectures  
144 behave similarly or differently to architectures with tight physical linkage be-  
145 tween loci affecting different traits, with respect to their effects on genetic  
146 correlations between the traits. We use computer simulations to investigate  
147 whether the effect of evolutionary forces on the genetic correlation between  
148 traits is dependent on the type of genetic architecture, and how. We fo-  
149 cus on the relative contributions of selection, mutation and migration to the  
150 build up of genetic correlation between traits having different genetic archi-  
151 tectures. We show that unless mutation rates are high, genetic architectures  
152 with tight linkage between loci maintain much lower equilibrium genetic cor-  
153 relations than pleiotropic architectures. Even when mutation rates are high,  
154 other evolutionary forces affecting equilibrium levels of genetic correlation  
155 still show a difference between architectures but to a much lesser extent. Ad-  
156 ditionally, we simulate genomic single-nucleotide polymorphism (SNP) data  
157 sets using the different architectures, and show that linkage distances affect  
158 false positive proportions in GWA analyses.

## 159 **Methods**

160 We modeled four different genetic architectures in a modified version of  
161 the individual-based, forward-in-time, population genetics simulation soft-  
162 ware NEMO (Guillaume and Rougemont, 2006; Chebib and Guillaume, 2017).  
163 NEMO was modified to allow single non-pleiotropic loci to affect different  
164 quantitative traits. To compare how pleiotropy and linkage differentially af-  
165 fect the genetic correlation between traits, we modeled a set of 120 pairs of  
166 linked, non-pleiotropic loci, and a set of 120 pleiotropic loci affecting the two  
167 traits. We varied the recombination distance between the two non-pleiotropic  
168 loci of each pair with distances 0cM, 0.1cM, or 1cM (Figure 1). Pairs were

169 unlinked to other pairs and placed on separate chromosomes. The pleiotropic  
170 loci were also unlinked to each other. The recombination rates chosen rep-  
171 resent no recombination between linked loci, as well as an average and an  
172 extreme value of recombination at “hotspots” in the human genome, respec-  
173 tively (Myers et al., 2006). All loci had additive effects on the traits.

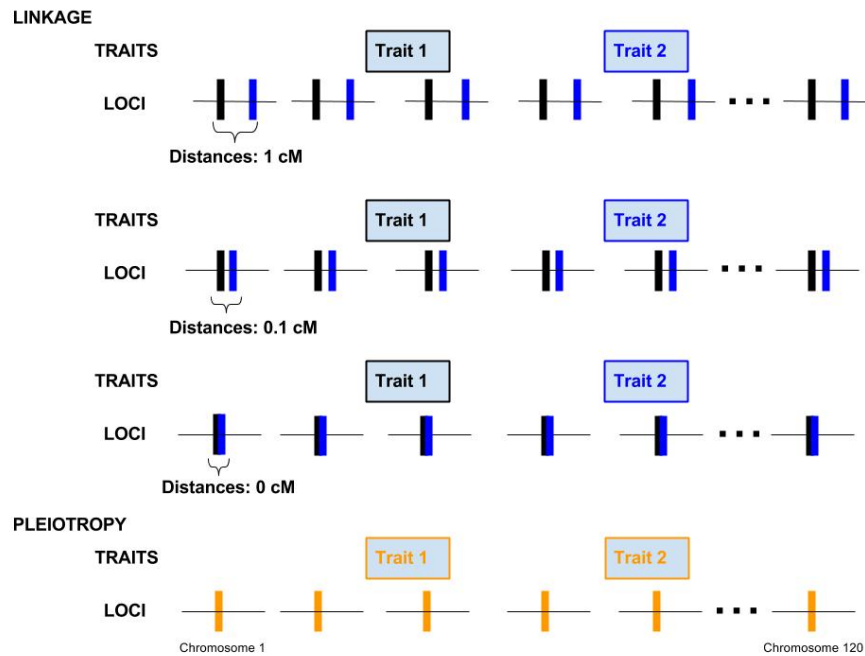

Figure 1: Four genetic architectures showing the distribution of loci on 120 chromosomes. In the case of linkage architectures, pairs of loci affecting the two different traits on each chromosome are either 1, 0.1 or 0 cM apart. In the case of the pleiotropic architecture, each locus on each chromosome affects both traits.

174 Unless otherwise specified, each simulation was run with 5,000 initially  
175 monomorphic (variation is gradually introduced through mutations), diploid  
176 individuals for 10,000 generations achieving mutation-selection(-migration)  
177 balance in order to observe general patterns of genetic correlation in the  
178 near-absence of drift. Individuals were hermaphrodites mating at random  
179 within a population, with non-overlapping generations. Phenotypes were  
180 calculated for each of the two traits modeled by summing the allelic values



181 of all loci affecting one trait. Gaussian stabilizing selection was applied and  
182 determined the survival probability of juveniles, whose fitness was calculated  
183 as  $w = \exp \left[ -\frac{1}{2} \left( (\mathbf{z} - \boldsymbol{\theta})^T \cdot \boldsymbol{\Omega}^{-1} \cdot (\mathbf{z} - \boldsymbol{\theta}) \right) \right]$ , where  $\mathbf{z}$  is the individual phe-  
184 notype vector (initialized to the optimum values),  $\boldsymbol{\theta}$  is the vector of local  
185 optimal trait values (set to 10 for both traits in the focal population), and  
186  $\boldsymbol{\Omega}$  is the selection variance-covariance matrix ( $n \times n$ , for  $n$  traits) describing  
187 the multivariate Gaussian selection surface. To examine the effects of the  
188 strength of stabilizing selection on each trait and strength of correlational  
189 selection between traits, different sets of simulations were run with the di-  
190 agonal elements of the  $\boldsymbol{\Omega}$  matrix set as  $\omega^2 = 50$ , or 100 (selection strength),  
191 and off-diagonal set to  $\omega^2 \times \rho_\omega$  (where the correlational selection,  $\rho_\omega = 0.5$   
192 or 0.9). The strength of selection scales inversely with  $\omega^2$  where a value of  
193 100 corresponds to weak (but non-trivial) selection as opposed to correla-  
194 tional selection,  $\rho_\omega$ , where a value of 0.9 corresponds to strong correlational  
195 selection between traits (Lande, 1984; Turelli, 1984).

196 To examine the effects of mutational input on genetic correlation between  
197 traits, different sets of simulations were run with mutation rates ( $\mu$ ) of 0.001,  
198 0.0001, or 0.00001, and moderate mutational effect sizes ( $\alpha^2$ ) of 0.1, 0.01,  
199 or 0.001 (Turelli, 1984). Mutational effects at each non-pleiotropic locus  
200 were drawn from a univariate normal distribution (with a mean of zero) or  
201 a bivariate normal distribution (with means of zero and a covariance of 0)  
202 for pleiotropic loci. Mutational effects were then added to the existing allelic  
203 values (continuum-of-alleles model; Crow and Kimura, 1964). All loci were  
204 assumed to have equal mutational variance. No environmental effects on the  
205 traits were included.

206 To examine the effects of migration from a source population on genetic  
207 correlation between traits, additional sets of simulations were run with uni-  
208 directional migration from a second population (as in an island-mainland  
209 model with each population consisting of 5000 individuals) with backward  
210 migration rates ( $m$ ) of 0.1, 0.01, and 0.001. The backward migration rate

211 represents the average proportion of new individuals in the focal population  
212 whose parent is from the source population. The local optimum values for  
213 the two traits in the source population were set at  $\theta = [\sqrt{50}, \sqrt{50}]$  (10  
214 units distance from the focal population's local optimum). Both focal and  
215 source populations had weak stabilizing selection with a strength of  $\omega^2 = 100$ ,  
216 the focal population had no correlational selection between the two traits  
217 and the source population had a correlational selection of  $\rho_\omega = 0$  or 0.9.  
218 Fifty replicate simulations were run for each set of parameter values and  
219 statistics were averaged over replicates. Averages were also compared against  
220 analytical expectations laid out by Lande (1984) and reproduced here in  
221 Equations 1–3.

222 *Effects of genetic architecture on false positive/negative proportions in asso-*  
223 *ciation studies*

224 In order to elucidate the differential effects of pleiotropy and linkage on the  
225 detection of true causal genetic variants in association studies, a genome-wide  
226 association (GWA) analysis was performed on data simulated as described  
227 above (with only a single population), except that diallelic loci were used in-  
228 stead of a continuum-of-alleles model to better represent SNPs. Correlational  
229 selection values were chosen that provided equal on-average genetic correla-  
230 tions between traits for all genetic architectures of 0.2, 0.3, and 0.4 values  
231 frequently observed in both morphological and life-history traits (Roff, 1996).  
232 In the association study, a per-locus regression of trait values was performed  
233 over genotypes, and the (negative log 10) p-values of regression slopes were  
234 plotted with a Benjamini-Hochberg False Discovery Rate (FDR) cutoff to  
235 adjust significance levels for multiple tests (Benjamini and Hochberg, 1995).  
236 From this, we observed the number (and proportion) of false positives (linked  
237 loci that had no effect on a trait but whose regression slope p-values were  
238 above the FDR cutoff for that same trait) and false negatives (pleiotropic loci  
239 that had an effect on both traits but whose regression slope p-values were  
240 below the FDR cutoff for either trait). No correction for population strat-

241 ification was performed during this analysis because each simulation had a  
242 single, large, randomly breeding population. Linkage disequilibrium values  
243 of  $D'$  and  $R^2$  between pairs of linked traits were also calculated using the **R**  
244 package genetics (v1.3.8.1) (Warnes et al., 2013). Statistics for number and  
245 proportion of false positives and negatives were obtained from the average  
246 over 20 replicate simulations of each genetic architecture.

## 247 **Results**

### 248 *Effects of genetic architecture on genetic correlation at mutation-selection* 249 *balance*

250 By generation 10,000, when mutation-selection balance is reached, simu-  
251 lations with the pleiotropic architecture generally maintain a higher average  
252 genetic correlation than those with linkage architectures, even when recom-  
253 bination is absent (linkage distance of 0cM between pairs of loci) (Figure  
254 2). Variation in the mutation rate has the largest effect on the difference of  
255 genetic correlation between pleiotropic loci and fully linked non-pleiotropic  
256 loci (0cM), with much lower correlations as the mutation rate decreases from  
257  $10^{-3}$  to  $10^{-5}$  (Figure 3). This reduction in genetic correlation mostly affected  
258 the non-pleiotropic pairs of loci for which a large drop in genetic correlation  
259 occurred between  $\mu = 10^{-3}$  and  $\mu = 10^{-4}$  (Figure 3). With lower mutation  
260 rate there is also a lower total genetic variance and lower genetic covariance.  
261 The higher genetic correlation obtained with pleiotropic loci was due to a  
262 lower total genetic variance when the mutation rate was high ( $\mu = 10^{-3}$ ),  
263 but to a higher genetic covariance when mutation rate was low ( $\mu = 10^{-4}$  or  
264  $10^{-5}$ ).

265 The genetic correlation between the traits decreases with reduction in  
266 all four factors tested and for all genetic architectures, with the coefficient of  
267 correlational selection ( $\rho_\omega$ ) having the strongest effect (Figure 4), as expected  
268 from equation (3). However, changes in the strength of selection ( $\omega^2$ ) and the  
269 mutational variance ( $\alpha^2$ ) also affect the genetic correlation at equilibrium.

270 We find that reducing the strength of selection (Figure 5) had a relatively  
271 smaller effect than reducing the mutational variance (Figure 6). A decrease  
272 in mutational variance leads to a decrease in genetic correlation by a similar  
273 amount regardless of genetic architecture (though loose linkage is affected  
274 the most). Populations with linkage architectures need both high mutation  
275 rates and high mutational variance to maintain strong genetic correlation,  
276 whereas the pleiotropic architecture just needs high mutational variance.

277 In contrast to the correlation, the genetic covariance of the two traits  
278 was generally equal between pleiotropic and fully linked non-pleiotropic loci,  
279 and decreased as recombination increased within pairs of non-pleiotropic loci.  
280 The cause of the observed higher trait correlation obtained with pleiotropic  
281 loci was the lower genetic variance they maintain under stabilizing selection.

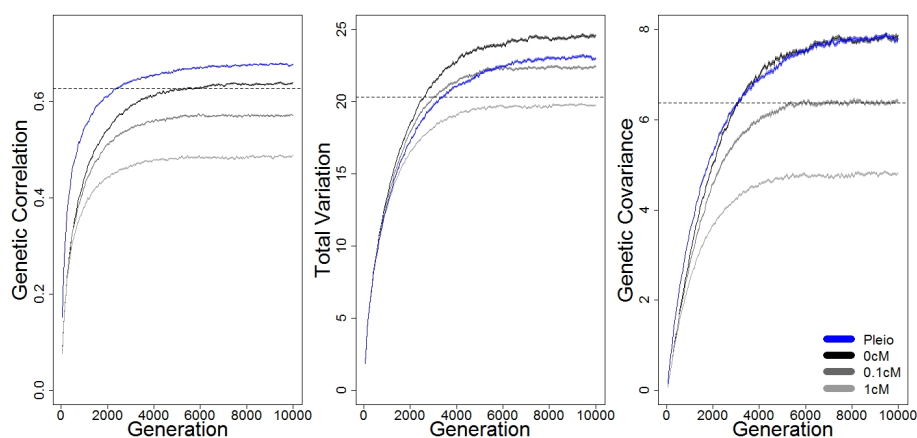

Figure 2: Average genetic correlation, total genetic variation and genetic covariation (and their standard deviations) over 10,000 generations reaching mutation-selection equilibrium for four different genetic architectures: pairs of linked loci affecting two different traits with 0, 0.1 or 1cM between loci, or pleiotropic loci affecting both traits.  $N = 5000$ ,  $\omega^2 = 100$ ,  $\rho_\omega = 0.9$ ,  $\alpha^2 = 0.1$ , and  $\mu = 0.001$ . Dashed line represents Lande's 1984 expectations for completely linked loci (0 cm).

### 282 *Effects of migration on genetic correlation*

283 A higher migration rate from a source population, whose traits are under  
284 correlational selection, leads to higher genetic correlations in the focal popu-

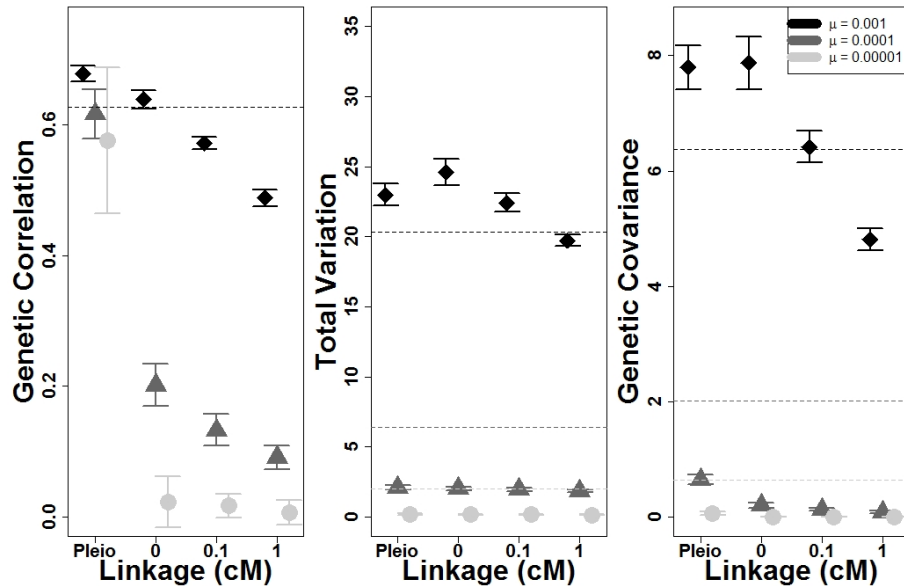

Figure 3: Effect of mutation rate ( $\mu$ ) on average genetic correlation, total variance and genetic covariance (and their standard deviations) after 10,000 generations of correlated, stabilizing selection for four different genetic architectures.  $N = 5000$ ,  $\omega^2 = 100$ ,  $\rho_\omega = 0.9$ , and  $\alpha^2 = 0.1$ . Dashed lines represents Lande's 1984 expectations for completely linked loci (0 cM).

285 lation than with no migration regardless of the genetic architecture (Figure  
 286 7A). The effect of migration increases with tighter linkage and is highest with  
 287 pleiotropic architecture. This effect on genetic correlation is still observed  
 288 when there is no correlational selection on the traits in the source population,  
 289 but to a largely reduced degree (Figure 7B).

290 *Effects of linkage and pleiotropy on proportion of false positives/negatives*  
 291 *and linkage disequilibrium in multi-trait GWASes*

292 In simulations where there is linkage between SNPs and equivalent levels  
 293 of genetic correlation between traits, the number and proportion of loci that  
 294 are false positives (above FDR cutoff but no effect on trait) increase as linkage  
 295 distance decreases between SNPs affecting different traits (shown in Figure  
 296 8 and Supplementary Figure S1). When genetic correlation is higher (due to

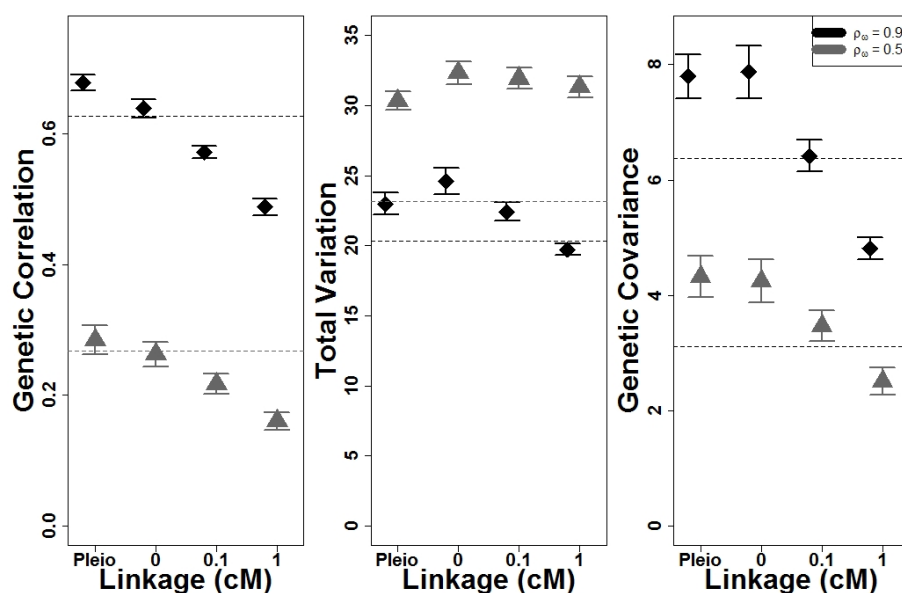

Figure 4: Effect of correlational selection ( $\rho_\omega$ ) on average genetic correlation, total variance and genetic covariance (and their standard deviations) after 10,000 generations of correlated, stabilizing selection for four different genetic architectures.  $N = 5000$ ,  $\omega^2 = 100$ ,  $\alpha^2 = 0.1$ , and  $\mu = 0.001$ . Dashed lines represents Lande's 1984 expectations for completely linked loci (0 cM).

297 stronger correlational selection), linkage distance has a greater impact on the  
 298 proportion of false positives. Also, genetic correlation has a larger effect than  
 299 linkage distance on the number of false positives. In simulations where SNPs  
 300 are pleiotropic, genetic correlation due to correlational selection has little  
 301 impact on the number and proportion of false negatives (below FDR cutoff  
 302 but does affect the traits). Linkage disequilibrium between pairs of linked  
 303 SNPs decreases as distance between SNPs increases regardless of genetic  
 304 correlation (Figure 9 and Supplemental Table S1). Long-distance linkage  
 305 disequilibrium between unlinked SNPs increases when the distance between  
 306 pairs of linked SNPs increases (when measured with  $D'$ ), and is higher with  
 307 higher genetic correlation when comparing the same genetic architectures  
 308 (Supplemental Figure S2). In simulations where SNPs are pleiotropic, long-  
 309 distance linkage disequilibrium does not seem to be affected by change in

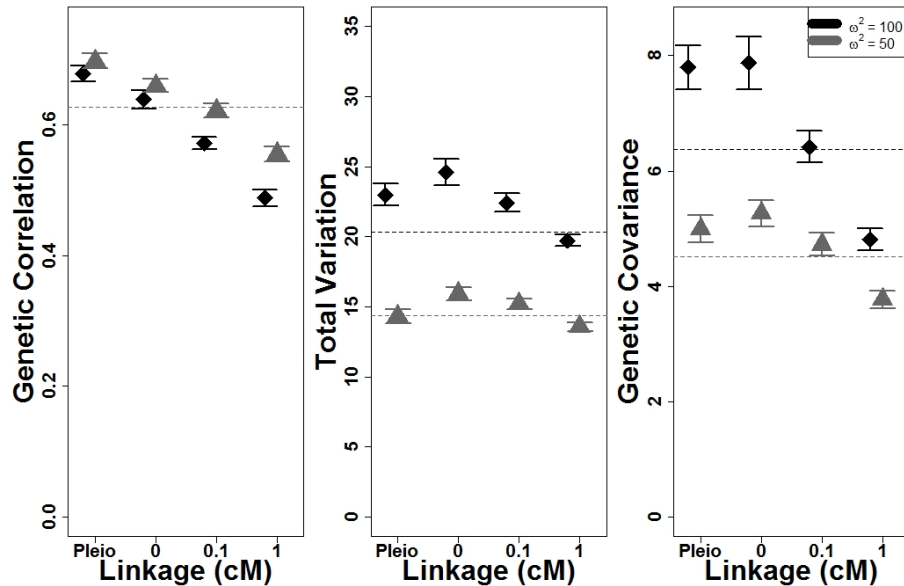

Figure 5: Effect of selection variance ( $\omega^2$ ) on average genetic correlation, total variance and genetic covariance (and their standard deviations) after 10,000 generations of correlated, stabilizing selection for four different genetic architectures.  $N = 5000$ ,  $\rho_\omega = 0.9$ ,  $\alpha^2 = 0.1$ , and  $\mu = 0.001$ . Dashed lines represents Lande's 1984 expectations for completely linked loci (0 cM).

310 genetic correlation.

## 311 Discussion

### 312 *Pleiotropy and linkage are not the same*

313 The main expectation under an assumption of weak selection and strong  
 314 correlational selection is that populations with a genetic architecture con-  
 315 sisting of unlinked pairs of two completely linked loci (0cM distance) should  
 316 maintain similar equilibrium levels of genetic correlation as with a genetic  
 317 architecture consisting of a lesser number of unlinked pleiotropic loci (Lande,  
 318 1984). Our results show that this is the case when there are half as many  
 319 pleiotropic loci and mutation rates are relatively high. A high rate of mu-  
 320 tation ( $10^{-3}$ ) allows for multiple mutations in both loci in a tightly linked

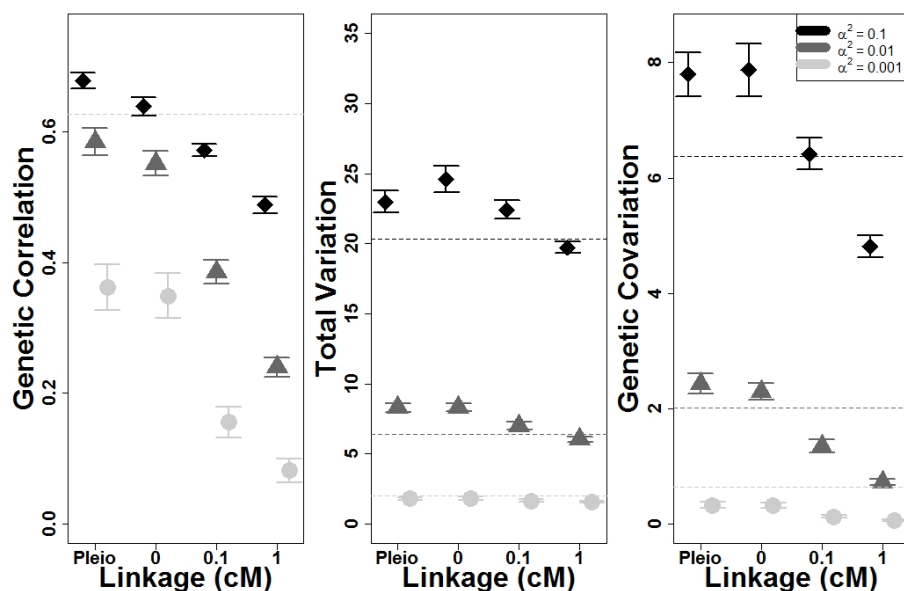

Figure 6: Effect of mutation variance ( $\alpha^2$ ) on average genetic correlation, total variance and genetic covariance (and their standard deviations) after 10,000 generations of correlated, stabilizing selection for four different genetic architectures.  $N = 5000$ ,  $\omega^2 = 100$ ,  $\rho_\omega = 0.9$ , and  $\mu = 0.001$ . Dashed lines represents Lande's 1984 expectations for completely linked loci (0 cM).

321 pair to accumulate and maintain levels of genetic covariance near to that of  
 322 mutations in a single pleiotropic locus, but empirical estimations of muta-  
 323 tion rates from varied species like bacteria and humans suggests that *per-*  
 324 *nucleotide* mutation rates are in the order of  $10^{-8}$  to  $10^{-9}$  (Nachman and  
 325 Crowell, 2000; Lynch, 2010; Ford et al., 2011). If a polygenic locus consists  
 326 of hundreds or thousands of nucleotides, as in the case of many quantitative  
 327 trait loci (QTLs), then per-locus mutation rates may be as high as  $10^{-5}$ , but  
 328 the larger the locus the higher the chance of recombination between within-  
 329 locus variants that are contributing to genetic correlation. This leads us to  
 330 believe that with empirically estimated levels of mutation and recombination,  
 331 strong genetic correlation between traits are more likely to be maintained if  
 332 there is an underlying pleiotropic architecture affecting them than will be  
 333 maintained due to tight linkage. Consequently, GWASes that detect asso-



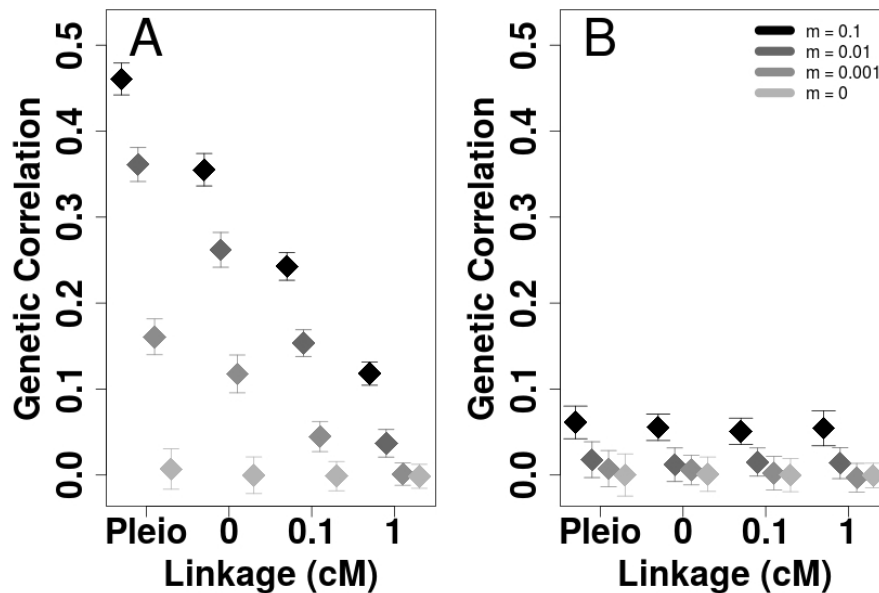

Figure 7: Average genetic correlations in the focal populations (and their standard deviations) after 10,000 generations of migration from a source population with different migration rates ( $m$ ) for four different genetic architectures. A– Migration from a source population with correlational selection between traits ( $\rho_\omega = 0.9$ ). B– Migration from a source population without correlational selection between traits ( $\rho_\omega = 0$ ).

334 ciations between multiple traits and single genetic variants are more likely  
335 to be detecting pleiotropic loci than linked loci. Also, previous theoretical  
336 models suggest that Lande’s (1984) equilibrium levels of genetic variation  
337 are not well approximated at low per-locus mutation rates (compared to the  
338 strength of selection), which was also true in our simulations (Supplemental  
339 Figure S3) (Turelli, 1984).

340 We find that even under scenarios where pleiotropy and tight linkage  
341 maintain similar levels of genetic covariance, pleiotropic architectures have  
342 higher genetic correlations because they have lower total genetic variance.  
343 This can be explained by understanding the differential fitness effects of loci.  
344 Mutations that affect more than one trait are less likely to be beneficial (Orr,  
345 1998; Otto, 2004). The distribution of fitness effects of pleiotropic mutations  
346 is shifted towards more negative average values as the number of traits af-

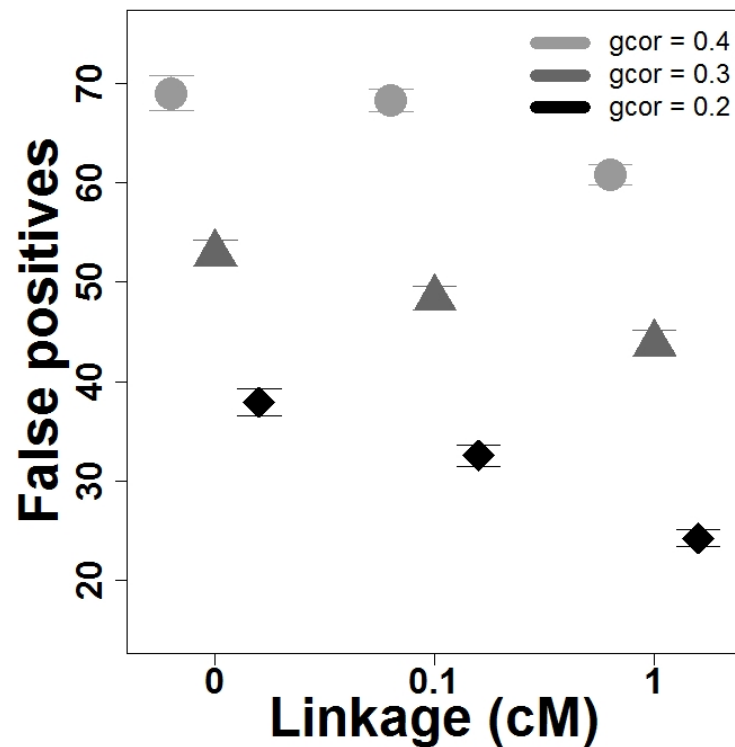

Figure 8: Average number of false positives from GWA analyses (and their standard deviations) for different linkage distances between paired loci and different genetic correlations (gcor). A locus was considered a false positive if associations between the locus' genotypes and trait values, that the locus does not directly affect, are above the Benjamini-Hochberg FDR cutoffs (with a significance level of 0.05).

347 fected increases (Martin and Lenormand, 2006; Chevin et al., 2010). Hence,  
348 pleiotropic architectures that affect more traits have less positive mutational  
349 effects on fitness and maintain a lower equilibrium genetic variation when  
350 compared to linked architectures (Turelli, 1985). It has been suggested that  
351 this might be overcome in more complex organisms with a greater number  
352 of traits by modularization of the effects of different pleiotropic genes to  
353 separate sets of traits and decrease the pleiotropic degree of the mutations  
354 but theoretical models have shown mixed results (Baatz and Wagner, 1997;  
355 Hansen, 2003; Welch et al., 2003; Martin and Lenormand, 2006; Chevin et al.,

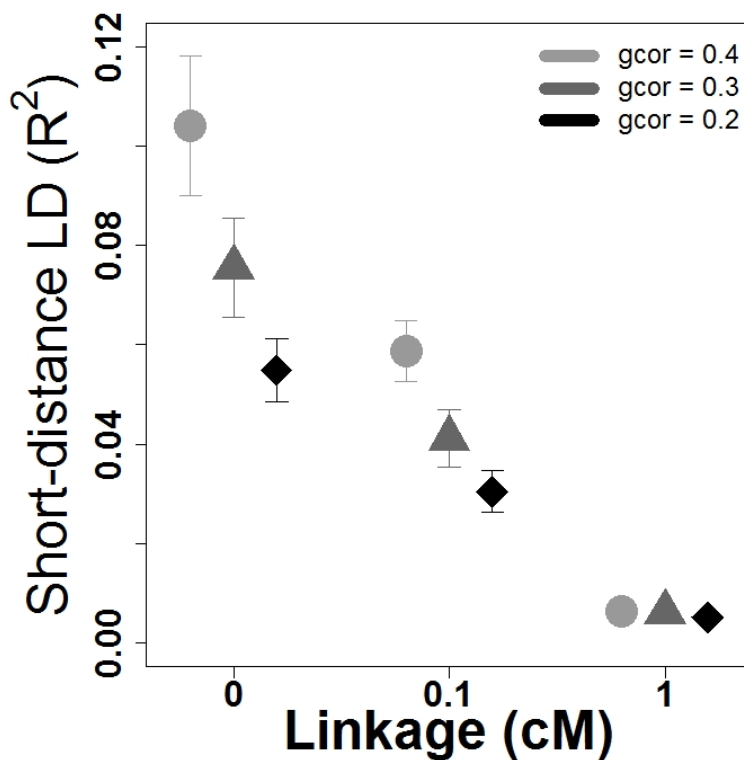

Figure 9: Average linkage disequilibrium (LD) between pairs of linked loci (and their standard deviations) for different linkage distances between paired loci and different genetic correlations (gcor).

2010; Wagner and Zhang, 2011).

When correlational selection between traits is strong in the simulations with linked architectures, the genetic correlation is dependent on the recombination rates between loci affecting different traits where tightly linked loci can maintain higher levels of genetic correlation from a build-up of positive linkage disequilibrium than loosely linked loci. This matches the analytical predictions put forth in Lande (1984) under the assumption of weak stabilizing selection, strong correlational selection, and loose linkage between loci affecting the same trait.

365 *The impact of pleiotropy and linkage maintaining different genetic correla-*  
366 *tions in association studies*

367 When methods like GWA analyses are employed to detect shared ge-  
368 netic influences (pleiotropy or linkage) on multiple traits of interest, they  
369 are dependent upon detecting combinations of effect sizes of genetic variants  
370 associated with those traits (Hill and Zhang, 2012b,a; Chung et al., 2014;  
371 Visscher and Yang, 2016). The success or failure of this endeavor is directly  
372 connected to the ability to detect loci with associations to each trait and  
373 the strength of genetic correlation between traits (Wei et al., 2014; Pickrell  
374 et al., 2016; Chesmore et al., 2018; Verbanck et al., 2018). Our results show  
375 that (tight) linkage between loci affecting different traits will lead to “many”  
376 false positives. Therefore, GWASes will not be able to distinguish between  
377 pleiotropy and linkage, empirically. The proportion of genes associated with  
378 two or more phenotypes in the GWAS catalog has increased to around 40% in  
379 the last decade (Welter et al., 2013; Pickrell et al., 2016). But it is difficult to  
380 determine if this is truly representative of the prevalence of pleiotropy because  
381 QTLs are often mapped to loci that can encompass thousands of nucleotides  
382 (and more than one gene) and informative SNPs with significant effect sizes  
383 are assigned to the closest genes with annotated phenotypes (Chesmore et al.,  
384 2018; Liu et al., 2019). Conflating inter-genic pleiotropic SNPs with nearby  
385 pleiotropic genes (or loci) can distort the prevalence of pleiotropy and re-  
386 duce the ability to distinguish pleiotropy and physical linkage, which in turn  
387 can reduce the efficacy of treatments dependent on those results (like gene  
388 targeted therapies) (Dudley et al., 2005; Gianola et al., 2015). Finding out  
389 the true false positive rate in GWA studies due to linkage is difficult because  
390 it is almost never known whether the source of genetic correlations between  
391 traits is linked loci or not, even when fine-scale sequences are available (for the  
392 reasons mentioned above and because of the way pleiotropy is erroneously de-  
393 fined in GWA studies) (Platt et al., 2010). Watanabe et al. (2018) attempted  
394 to break down this issue in a meta-analysis of 558 GWASes by looking at

395 the proportion of genomic loci, genes, and SNPs associated with multiple  
396 traits, which may provide a clearer picture of the prevalence of pleiotropic  
397 causal variants. They found that 93.3% of loci, 81.0% of genes, and 60.2% of  
398 SNPs, were associated with more than one trait. This may seem to provide  
399 a better estimate of pleiotropic levels, except that in this study SNPs that  
400 were associated with more than one trait could still have been the result of  
401 linkage disequilibrium. A point that was brought up by the authors.

402 When there is tighter linkage between loci affecting separate traits, there  
403 is also a higher proportion of loci that will be statistically associated with  
404 traits that they do not affect (false positives). This is expected (for the  
405 same level of genetic correlation between traits), since the genetic correla-  
406 tion, and therefore the power to detect a locus linked to a causal variant, is  
407 proportional to the correlation coefficient between loci (given by their linkage  
408 disequilibrium) (Siegmond and Yakir, 2007). Of course, in the simulations in  
409 our study all loci had effects on traits and there was correlational selection  
410 on those traits. Had there been neutral loci linked to the causal loci instead,  
411 then linkage distance between them would have been solely responsible for  
412 the number of false positives. On the other hand, very few false negatives  
413 in pleiotropic loci were observed (regardless of genetic correlation) because  
414 we “sampled” the entire population and therefore had the power to find  
415 significant associations with (almost) all causal loci. Had we taken smaller  
416 samples of our population to perform the GWA analysis, we would have found  
417 a greater number of false negatives. The salient consequence is that study  
418 design, threshold levels, and genetic correlations between traits will all affect  
419 detection of genetic variants, whether the variants are causal themselves or  
420 linked to causal variants (Wagner and Zhang, 2011; Hill and Zhang, 2012a).  
421 Also, the number of pleiotropic effects a locus has may be under-represented  
422 by significance levels in association studies (Hill and Zhang, 2012b). Wagner  
423 and Zhang 2011 go a step further to suggest that number or proportions of  
424 traits affected may not be as meaningful as describing the distributions of

425 pleiotropic effect sizes on traits.

426 *There is a difference between pleiotropy and linkage at the nucleotide level*

427 Transgenic experiments may differentiate pleiotropy from linkage at the  
428 gene level (Mills et al., 2014), but at the nucleotide level does the distinction  
429 between two linked loci and one pleiotropic locus go away? There is evidence  
430 that even in the same gene, adjacent polymorphisms affecting different traits  
431 in *Drosophila* can be in linkage equilibrium due to fine-scale recombination  
432 (Carbone et al., 2006; Flint and Mackay, 2009). But imagine a case where  
433 a mutation in a single base-pair has an effect on one trait and a mutation  
434 in the base-pair right next to the first base-pair has an effect on a second  
435 trait. Now imagine a second case where a mutation in a single base-pair  
436 has an effect on two traits. There still seems to be a distinction between  
437 these two cases because the probability of a change in both traits in the first  
438 case is the mutation rate squared compared to the second case where the  
439 probability of a change in both traits is just the mutation rate. Depend-  
440 ing on the per-locus mutation rate this difference can be quite large (e.g.  
441  $10^{-4}$  versus  $10^{-16}$ ). Even in this extreme case, there may indeed still be a  
442 gray area in the distinction between pleiotropy and linkage at a mutational  
443 level. Mutations may affect the pleiotropic degree (e.g. like enzyme speci-  
444 ficity) of a protein-coding gene and the degree to which the gene maintains  
445 multi-functionality may itself evolve (Guillaume and Otto, 2012). If there  
446 is correlational selection between the catalytic functions of an enzyme, then  
447 some pleiotropic mutations that affect more than one catalytic ability will  
448 be favoured, and genetic correlations will increase. With this in mind, it  
449 makes more sense from a theoretical and functional standpoint to refer to  
450 pleiotropy at the nucleotide level (or at the unit of a mutation), than at the  
451 gene or larger locus level (but this may depend on the questions of interest  
452 (Rockman, 2012; Rausher and Delph, 2015)).

453 *Other factors*

454 Even in the absence of correlational selection it is possible to maintain  
455 genetic correlation through continued migration from a source population.  
456 High migration brings individuals whose combination of alleles will expand  
457 focal population variation in the direction of the source population. This  
458 corroborates previous results that showed that slow introgression of allelic  
459 combinations into a population can affect the genetic variance-covariance  
460 structure of that population (Guillaume and Whitlock, 2007). Whether ge-  
461 netic covariance will be maintained in real populations depends on the nature  
462 of correlational selection on traits in the population of interest, since migra-  
463 tion can reduce local fitness (i.e. migration load) if allele combinations are not  
464 favoured by selection or increase it if they are (Nosil et al., 2006; Bolnick and  
465 Otto, 2013). Migration into a population will also affect false positive rates  
466 since immigrating allele combinations will be in LD from the source popula-  
467 tion and will therefore increase the proportion of certain genotypes, even if  
468 there is no strong trait correlation in the source population. Although not  
469 investigated in this study, a structured population and/or a continual system  
470 of inbreeding in a population where there is correlational selection between  
471 polygenic traits can result in increased genetic covariation caused by larger  
472 LD Lande (1984), which can in turn increase false positive proportions.

473 **Conclusion**

474 Pleiotropic loci maintain stronger genetic correlations between traits than  
475 linked loci affecting different traits even when no recombination occurs be-  
476 tween the loci, and especially in the magnitude of empirically estimated mu-  
477 tation rates. Previous models of the maintenance of genetic covariation at  
478 mutation-selection equilibrium describe genetic covariation as a function of  
479 the product of mutation rate and variance. These models provide similar  
480 expectations for pleiotropic and tight linkage architectures. The discrepancy

481 occurs because of the contingency of mutational covariance input on the oc-  
482 currence of mutations (and hence mutation rate). Without high mutation  
483 rates, the ability to create genetic covariance between linked loci is highly  
484 diminished because the combined likelihood of mutations in each linked loci  
485 with both mutational effects in the same direction is low. This result will  
486 have implications in the type of underlying architecture we expect to find  
487 in multi-trait association studies. On the one hand, tighter linkage between  
488 causal loci and detected loci maintains higher genetic correlations, leading  
489 to a greater proportion of causal variant false positives. More importantly,  
490 variants are more likely to have pleiotropic effects on traits than linked ef-  
491 fects, when they are found to be associated with multiple, strongly correlated  
492 traits.

### 493 **Acknowledgments**

494 This manuscript benefited from the comments and constructive criticism  
495 provided by Kathleen Lotterhos, Pr Ingvarsson, and an anonymous reviewer  
496 at PCI Evolutionary Biology. J.C. and F.G. were supported by the Swiss  
497 National Science Foundation, grant PP00P3 144846/1 to F.G.

### 498 **Author Contributions**

499 J.C. performed software modification for model implementation and ac-  
500 quisition of data, as well as drafting of manuscript. J.C. and F.G. performed  
501 study conception and design, analysis and interpretation of data, and critical  
502 revision of manuscript.

### 503 **Data Archival**

504 The data for this study will be made available online through Zenodo on-  
505 line repository at <https://zenodo.org/record/3370185#collapseTwo> and code  
506 for simulations can be found [https://sourceforge.net/projects/nemo2/files/Publications-  
507 Code/ChebibGuillaume-PleiotropyOrLinkage-2019/](https://sourceforge.net/projects/nemo2/files/Publications-Code/ChebibGuillaume-PleiotropyOrLinkage-2019/)



508 **Conflict of interest disclosure**

509       The authors of this article declare that they have no financial conflict of  
510 interest with the content of this article.

511 Supplemental

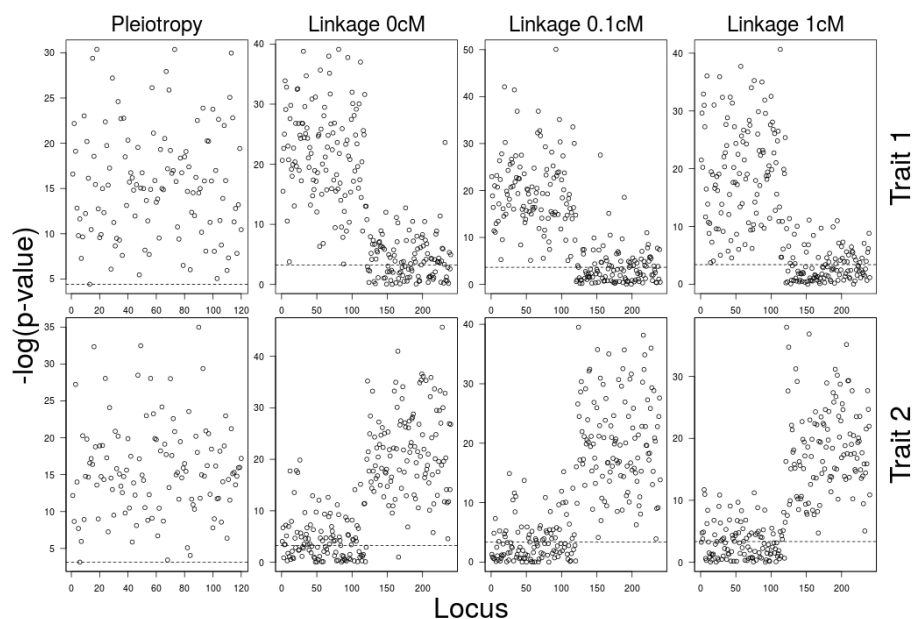

Figure S1: GWA analysis:  $-\log(p\text{-values of slope of regression of trait values on genotypes})$  from one set of example simulations. In the case of linkage architectures, the first 120 loci only affected trait 1 and the next 120 loci only affected trait 2. The order of the loci are sorted for visualization purposes whereby linked pairs are separated by the trait they affect (e.g. loci 1 and 121 in the figure are a linked pair). In the case of the pleiotropic architecture, all 120 loci affected both traits. The average genetic correlation of  $\approx 0.3$  was observed by adjusting the correlational selection levels to 0.88, 0.89, 0.93, and 0.965 for pleiotropy, linkage 0cM, linkage 0.1cM, and linkage 1cM, respectively. Dashed lines represent the Benjamini-Hochberg FDR cutoffs for a significance level of 0.05.

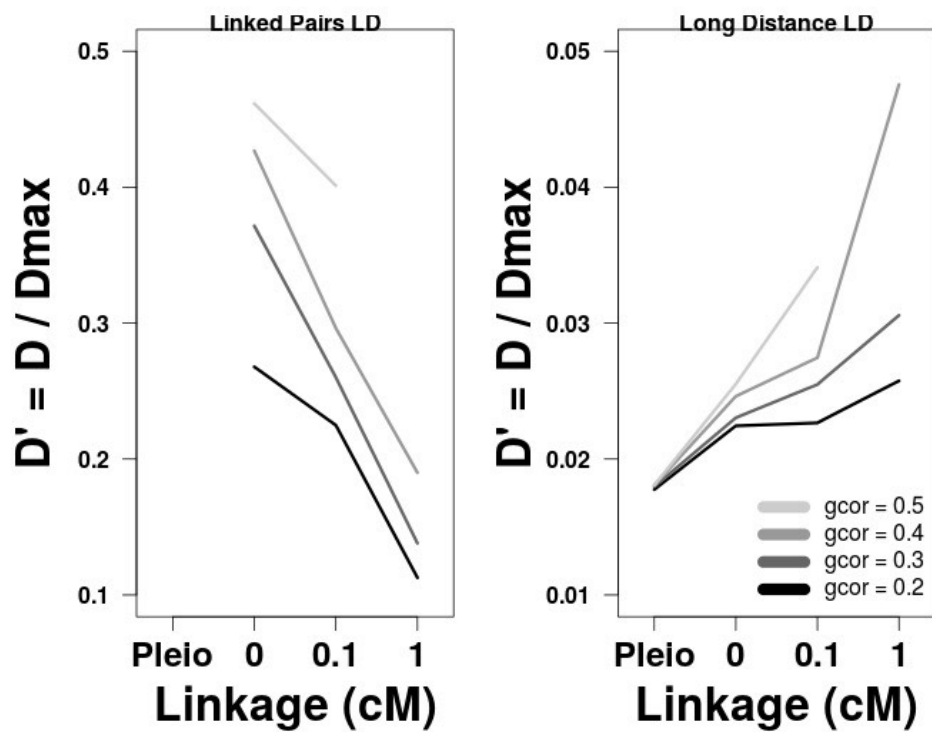

Figure S2: Average linkage disequilibrium (measured by  $D'$ ) between linked pairs (left panel) and between unlinked pairs (right panels) for different genetic correlations and genetic architectures. N.B. No linked pairs existed between pleiotropic loci.

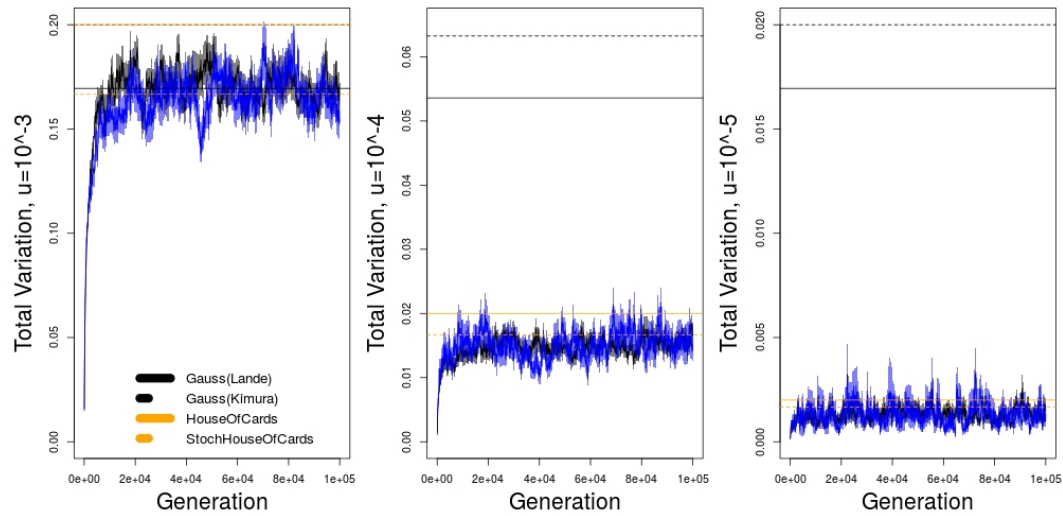

Figure S3: Average genetic variances for different mutation rates and genetic architectures, with either one pleiotropic locus or two completely linked loci, compared against theoretical expectations from several models (Bürger, 2000).

Table S1: Results of GWA analyses for different architectures with average false negatives (Type II errors) for pleiotropic architectures and false positives (Type I errors) for linkage architectures, as well as linkage disequilibrium (LD) measurement averages for short-distance (physically linked loci) and long-distance (unlinked loci) comparisons. The genetic architectures in the bottom half of the table have higher genetic correlations than the top half (created by adjusting correlational selection) to compare the differences at different genetic correlation.

| Genetic Architecture | Genetic Cor (SE) | Type I/II Error % | D' short | D' long | $R^2$ short | $R^2$ long |
|----------------------|------------------|-------------------|----------|---------|-------------|------------|
| Pleiotropy           | 0.308 (0.0046)   | 0.35%             | NA       | 0.018   | NA          | 0.00027    |
| Linkage (0cM)        | 0.300 (0.0055)   | 22.06%            | 0.37     | 0.023   | 0.089       | 0.00026    |
| Linkage (0.1cM)      | 0.300 (0.0045)   | 20.17%            | 0.26     | 0.025   | 0.047       | 0.00027    |
| Linkage (1cM)        | 0.308 (0.0035)   | 18.28%            | 0.13     | 0.030   | 0.007       | 0.00027    |
| Pleiotropy           | 0.407 (0.0048)   | 0.32%             | NA       | 0.018   | NA          | 0.00027    |
| Linkage (0cM)        | 0.398 (0.0074)   | 28.76%            | 0.43     | 0.025   | 0.107       | 0.00027    |
| Linkage (0.1cM)      | 0.408 (0.0035)   | 28.46%            | 0.30     | 0.027   | 0.050       | 0.00027    |
| Linkage (1cM)        | 0.404 (0.0029)   | 25.34%            | 0.19     | 0.048   | 0.006       | 0.00027    |

512 **References**

513 Arnold, S. J. (1992). Constraints on phenotypic evolution. *Am. Nat.*, pages  
514 S85–S107.

515 Baatz, M. and Wagner, G. P. (1997). Adaptive inertia caused by hidden  
516 pleiotropic effects. *Theor. Popul. Biol.*, 51(1):49–66.

517 Barrett, R. D. and Hoekstra, H. E. (2011). Molecular spandrels: tests of  
518 adaptation at the genetic level. *Nature Reviews Genetics*, 12(11):767.

519 Benjamini, Y. and Hochberg, Y. (1995). Controlling the false discovery rate:  
520 a practical and powerful approach to multiple testing. *Journal of the royal  
521 statistical society. Series B (Methodological)*, pages 289–300.

522 Bolnick, D. I. and Otto, S. P. (2013). The magnitude of local adaptation  
523 under genotype-dependent dispersal. *Ecology and evolution*, 3(14):4722–  
524 4735.

525 Bürger, R. (2000). *The mathematical theory of selection, recombination, and  
526 mutation*, volume 228. Wiley Chichester.

527 Cai, L., Fisher, A. L., Huang, H., and Xie, Z. (2016). Crispr-mediated genome  
528 editing and human diseases. *Genes & Diseases*, 3(4):244–251.

529 Carbone, M. A., Jordan, K. W., Lyman, R. F., Harbison, S. T., Leips, J.,  
530 Morgan, T. J., DeLuca, M., Awadalla, P., and Mackay, T. F. (2006). Phe-  
531 notypic variation and natural selection at catsup, a pleiotropic quantitative  
532 trait gene in drosophila. *Current Biology*, 16(9):912–919.

533 Chebib, J. and Guillaume, F. (2017). What affects the predictability of  
534 evolutionary constraints using a G-matrix? The relative effects of modular  
535 pleiotropy and mutational correlation. *Evolution*, 71(10).

536 Chesmore, K., Bartlett, J., and Williams, S. M. (2018). The ubiquity of  
537 pleiotropy in human disease. *Human genetics*, 137(1):39–44.

- 538 Chevin, L.-M., Martin, G., and Lenormand, T. (2010). Fisher’s model and  
539 the genomics of adaptation: restricted pleiotropy, heterogenous mutation,  
540 and parallel evolution. *Evolution*, 64(11):3213–3231.
- 541 Chung, D., Yang, C., Li, C., Gelernter, J., and Zhao, H. (2014). Gpa: a  
542 statistical approach to prioritizing gwas results by integrating pleiotropy  
543 and annotation. *PLoS genetics*, 10(11):e1004787.
- 544 Crow, J. F. and Kimura, M. (1964). The theory of genetic loads. *Proc. XI*  
545 *Int. Congr. Genetics*, 2:495–505.
- 546 Draghi, J. A. and Whitlock, M. C. (2012). Phenotypic plasticity facilitates  
547 mutational variance, genetic variance, and evolvability along the major  
548 axis of environmental variation. *Evolution*, 66(9):2891–2902.
- 549 Dudley, A. M., Janse, D. M., Tanay, A., Shamir, R., and Church, G. M.  
550 (2005). A global view of pleiotropy and phenotypically derived gene func-  
551 tion in yeast. *Molecular systems biology*, 1(1).
- 552 Edelstein, M. L., Abedi, M. R., and Wixon, J. (2007). Gene therapy clinical  
553 trials worldwide to 2007an update. *The Journal of Gene Medicine: A*  
554 *cross-disciplinary journal for research on the science of gene transfer and*  
555 *its clinical applications*, 9(10):833–842.
- 556 Falconer, D. S. and Mackay, T. F. (1996). *Introduction to quantitative genet-*  
557 *ics*. Longman, London, fourth edition.
- 558 Fisher, R. A. (1930). *The genetical theory of natural selection: a complete*  
559 *variorum edition*. Oxford University Press.
- 560 Flint, J. and Mackay, T. F. (2009). Genetic architecture of quantitative traits  
561 in mice, flies, and humans. *Genome research*, 19(5):723–733.
- 562 Ford, C. B., Lin, P. L., Chase, M. R., Shah, R. R., Iartchouk, O., Galagan,  
563 J., Mohaideen, N., Ioerger, T. R., Sacchettini, J. C., Lipsitch, M., et al.

- 564 (2011). Use of whole genome sequencing to estimate the mutation rate  
565 of mycobacterium tuberculosis during latent infection. *Nature genetics*,  
566 43(5):482–486.
- 567 Gianola, D., de los Campos, G., Toro, M. A., Naya, H., Schön, C.-C., and  
568 Sorensen, D. (2015). Do molecular markers inform about pleiotropy? *Ge-*  
569 *netics*, pages genetics–115.
- 570 Ginn, S. L., Amaya, A. K., Alexander, I. E., Edelstein, M., and Abedi, M. R.  
571 (2018). Gene therapy clinical trials worldwide to 2017: An update. *The*  
572 *journal of gene medicine*, 20(5):e3015.
- 573 Gratten, J. and Visscher, P. M. (2016). Genetic pleiotropy in complex  
574 traits and diseases: implications for genomic medicine. *Genome medicine*,  
575 8(1):78.
- 576 Griswold, C. K., Logsdon, B., and Gomulkiewicz, R. (2007). Neutral evolu-  
577 tion of multiple quantitative characters: a genealogical approach. *Genetics*,  
578 176(1):455–466.
- 579 Guillaume, F. and Otto, S. P. (2012). Gene functional trade-offs and the  
580 evolution of pleiotropy. *Genetics*, 192:1389–1409.
- 581 Guillaume, F. and Rougemont, J. (2006). Nemo:an evolutionary and popu-  
582 lation genetics programming framework. *Bioinformatics*, 22:2556–2557.
- 583 Guillaume, F. and Whitlock, M. C. (2007). Effects of migration on the genetic  
584 covariance matrix. *Evolution*, 61(10):2398–2409.
- 585 Hansen, T. F. (2003). Is modularity necessary for evolvability?: Remarks on  
586 the relationship between pleiotropy and evolvability. *Biosystems*, 69(2):83–  
587 94.



- 588 Hill, W. G. and Zhang, X.-S. (2012a). Assessing pleiotropy and its evolution-  
589 ary consequences: pleiotropy is not necessarily limited, nor need it hinder  
590 the evolution of complexity. *Nature Reviews Genetics*, 13(4):296.
- 591 Hill, W. G. and Zhang, X.-S. (2012b). On the pleiotropic structure of the  
592 genotype-phenotype map and the evolvability of complex organisms. *Ge-*  
593 *netics*, 190(3):1131–1137.
- 594 Hodgkin, J. (1998). Seven types of pleiotropy. *Int. J. Dev. Biol.*, 42(3):501–  
595 505.
- 596 Kingman, J. F. (1978). A simple model for the balance between selection  
597 and mutation. *Journal of Applied Probability*, 15(1):1–12.
- 598 Lande, R. (1980). The genetic covariance between characters maintained by  
599 pleiotropic mutations. *Genetics*, 94(1):203–215.
- 600 Lande, R. (1984). The genetic correlation between characters maintained by  
601 selection, linkage and inbreeding. *Genetics Research*, 44(3):309–320.
- 602 Liu, M., Jiang, Y., Wedow, R., Li, Y., Brazel, D., and others, . (2019).  
603 Association studies of up to 1.2 million individuals yield new insights into  
604 the genetic etiology of tobacco and alcohol use. *Nature Genetics*.
- 605 Lynch, M. (2010). Rate, molecular spectrum, and consequences of human  
606 mutation. *Proceedings of the National Academy of Sciences*, 107(3):961–  
607 968.
- 608 Lynch, M., Walsh, B., et al. (1998). *Genetics and analysis of quantitative*  
609 *traits*, volume 1. Sinauer Sunderland, MA.
- 610 Martin, G. and Lenormand, T. (2006). A general multivariate extension of  
611 fisher’s geometrical model and the distribution of mutation fitness effects  
612 across species. *Evolution*, 60(5):893–907.

- 613 Mills, M. G., Greenwood, A. K., and Peichel, C. L. (2014). Pleiotropic effects  
614 of a single gene on skeletal development and sensory system patterning in  
615 sticklebacks. *EvoDevo*, 5(1):5.
- 616 Myers, S., Spencer, C., Auton, A., Bottolo, L., Freeman, C., Donnelly, P., and  
617 McVean, G. (2006). The distribution and causes of meiotic recombination  
618 in the human genome. *Biochem. Soc. Trans.*, 34(4):536–530.
- 619 Nachman, M. W. and Crowell, S. L. (2000). Estimate of the mutation rate  
620 per nucleotide in humans. *Genetics*, 156(1):297–304.
- 621 Nosil, P., Crespi, B., Sandoval, C., and Kirkpatrick, M. (2006). Migration  
622 and the genetic covariance between habitat preference and performance.  
623 *The American Naturalist*, 167(3):E66–E78.
- 624 Orr, H. A. (1998). The population genetics of adaptation: the distribution  
625 of factors fixed during adaptive evolution. *Evolution*, 52(4):935–949.
- 626 Otto, S. P. (2004). Two steps forward, one step back: the pleiotropic effects  
627 of favoured alleles. *Proc. R. Soc. Lond (Biol)*, 271(1540):705–714.
- 628 Parkes, M., Cortes, A., Van Heel, D. A., and Brown, M. A. (2013). Genetic  
629 insights into common pathways and complex relationships among immune-  
630 mediated diseases. *Nature Reviews Genetics*, 14(9):661.
- 631 Peichel, C. L. and Marques, D. A. (2017). The genetic and molecular ar-  
632 chitecture of phenotypic diversity in sticklebacks. *Phil. Trans. R. Soc. B*,  
633 372(1713):20150486.
- 634 Pickrell, J. K., Berisa, T., Liu, J. Z., Ségurel, L., Tung, J. Y., and Hinds,  
635 D. A. (2016). Detection and interpretation of shared genetic influences on  
636 42 human traits. *Nature genetics*, 48(7):709.

- 637 Platt, A., Vilhjálmsón, B. J., and Nordborg, M. (2010). Conditions un-  
638 der which genome-wide association studies will be positively misleading.  
639 *Genetics*.
- 640 Rausher, M. D. and Delph, L. F. (2015). Commentary: When does un-  
641 derstanding phenotypic evolution require identification of the underlying  
642 genes? *Evolution*, 69(7):1655–1664.
- 643 Rockman, M. V. (2012). The qtn program and the alleles that matter for  
644 evolution: all that’s gold does not glitter. *Evolution: International Journal*  
645 *of Organic Evolution*, 66(1):1–17.
- 646 Roff, D. A. (1996). The evolution of genetic correlations: an analysis of  
647 patterns. *Evolution*, pages 1392–1403.
- 648 Saltz, J. B., Hessel, F. C., and Kelly, M. W. (2017). Trait correlations in the  
649 genomics era. *Trends in ecology & evolution*, 32(4):279–290.
- 650 Siegmund, D. and Yakir, B. (2007). *The statistics of gene mapping*. Springer  
651 Science & Business Media.
- 652 Stearns, F. W. (2010). One hundred years of pleiotropy: a retrospective.  
653 *Genetics*, 186(3):767–773.
- 654 Turelli, M. (1984). Heritable genetic variation via mutation-selection balance:  
655 Lerch’s zeta meets the abdominal bristle. *Theoretical population biology*,  
656 25(2):138–193.
- 657 Turelli, M. (1985). Effects of pleiotropy on predictions concerning mutation-  
658 selection balance for polygenic traits. *Genetics*, 111(1):165–195.
- 659 Turelli, M. and Barton, N. (1990). Dynamics of polygenic characters under  
660 selection. *Theoretical Population Biology*, 38(1):1–57.

- 661 Verbanck, M., Chen, C.-Y., Neale, B., and Do, R. (2018). Detection  
662 of widespread horizontal pleiotropy in causal relationships inferred from  
663 mendelian randomization between complex traits and diseases. *Nature*  
664 *genetics*, 50(5):693.
- 665 Visscher, P. M., Wray, N. R., Zhang, Q., Sklar, P., McCarthy, M. I., Brown,  
666 M. A., and Yang, J. (2017). 10 years of gwas discovery: biology, function,  
667 and translation. *The American Journal of Human Genetics*, 101(1):5–22.
- 668 Visscher, P. M. and Yang, J. (2016). A plethora of pleiotropy across complex  
669 traits. *Nature genetics*, 48(7):707.
- 670 Wagner, G. P., Pavlicev, M., and Cheverud, J. M. (2007). The road to  
671 modularity. *Nat. Rev. Genet.*, 8(12):921931.
- 672 Wagner, G. P. and Zhang, J. (2011). The pleiotropic structure of the  
673 genotype–phenotype map: the evolvability of complex organisms. *Nat.*  
674 *Rev. Genet.*, 12(3):204–213.
- 675 Walsh, B. and Blows, M. W. (2009). Abundant genetic variation + strong se-  
676 lection = multivariate genetic constraints: A geometric view of adaptation.  
677 *Annu. Rev. Ecol. Evol. Syst.*, 40(1):41–59.
- 678 Warnes, G., with contributions from Gregor Gorjanc, Leisch, F., and Man.,  
679 M. (2013). *genetics: Population Genetics*. R package version 1.3.8.1.
- 680 Watanabe, K., Stringer, S., Frei, O., Mirkov, M. U., Polderman, T. J., van der  
681 Sluis, S., Andreassen, O. A., Neale, B. M., and Posthuma, D. (2018).  
682 A global view of pleiotropy and genetic architecture in complex traits.  
683 *bioRxiv*, page 500090.
- 684 Wei, W.-H., Hemani, G., and Haley, C. S. (2014). Detecting epistasis in  
685 human complex traits. *Nature Reviews Genetics*, 15(11):722.

- 686 Wei, X. and Nielsen, R. (2019). Ccr5- 32 is deleterious in the homozygous  
687 state in humans. *Nature medicine*, page 1.
- 688 Welch, J. J., Waxman, D., and Houle, D. (2003). Modularity and the cost  
689 of complexity. *Evolution*, 57(8):1723–1734.
- 690 Welter, D., MacArthur, J., Morales, J., Burdett, T., Hall, P., Junkins, H.,  
691 Klemm, A., Flicek, P., Manolio, T., Hindorff, L., et al. (2013). The nhgri  
692 gwas catalog, a curated resource of snp-trait associations. *Nucleic acids  
693 research*, 42(D1):D1001–D1006.
- 694 Wright, S. (1977). Evolution and the genetics of populations. volume 3. exper-  
695 imental results and evolutionary deductions. *Evolution and the genetics of  
696 populations. Volume 3. Experimental results and evolutionary deductions*.
- 697 Zhu, Z., Zhang, F., Hu, H., Bakshi, A., Robinson, M. R., Powell, J. E.,  
698 Montgomery, G. W., Goddard, M. E., Wray, N. R., Visscher, P. M., et al.  
699 (2016). Integration of summary data from gwas and eqtl studies predicts  
700 complex trait gene targets. *Nature genetics*, 48(5):481.
